# Supplementary material for: A Comparative Analysis on the Effect of Variety of Grape Pomace Extracts on the Ice-Templated 3D Cryogel Features
Source: MDPI journal article supplement (doi:10.3390/gels7030076), 2021-06-23
Supplement: s1 [file s1]

## A Comparative Analysis on the Effect of Variety of Grape Pomace Extracts on the Ice-Templated 3D Cryogel Features

Irina Elena Raschip<sup>1\*</sup>, Nicusor Fifere<sup>1</sup> and Maria Valentina Dinu<sup>1</sup>

<sup>1</sup> Petru Poni Institute of Macromolecular Chemistry, Grigore Ghica Voda Alley 41A, Iasi, Romania

\* Correspondence: iecoj@icmpp.ro

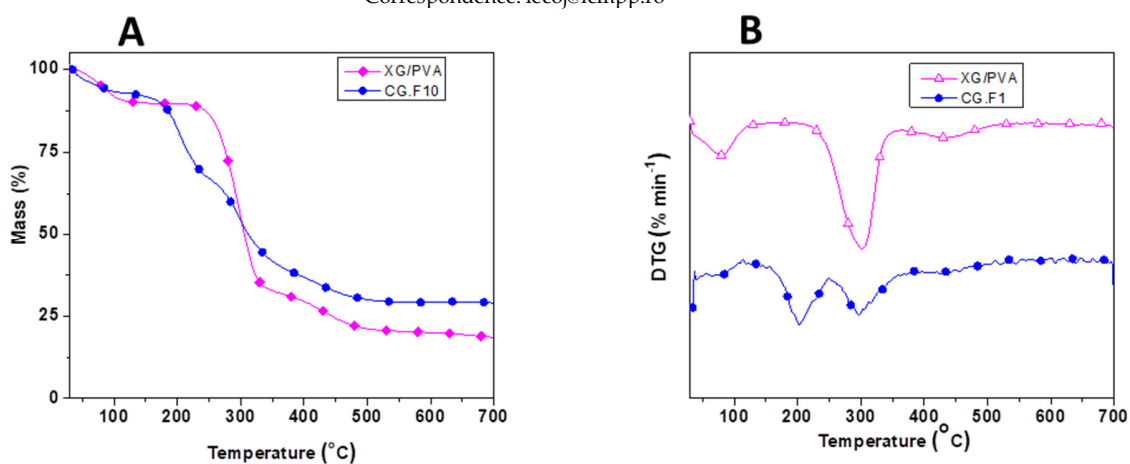

**Figure S1.** TGA (A) and DTG (B) curves of the XG/PVA and CG.F10 composite cryogels. All samples were prepared upon seven freeze-thawing cycles.
